# Supplementary material
Source: PubMed Central journal article supplement (PMC3179095)
Supplement: 1110617108_pnas.201110617SI.pdf [file 1110617108_pnas.201110617SI.pdf]

# Supporting Information

Gardner et al. 10.1073/pnas.1110617108

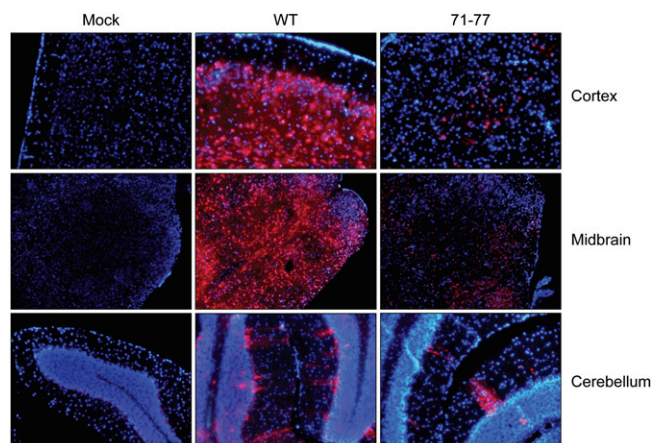

**Fig. S1.** Immunohistochemistry for virus antigen in brain sections from mock, WT, or 71-77 mutant-infected mice killed at 120 h postinfection (p.i.). Red signal is virus structural protein-specific, and blue signal is DAPI counterstain for cell nuclei. Results are representative of multiple sections from three mice. Original magnification: 200 $\times$ .

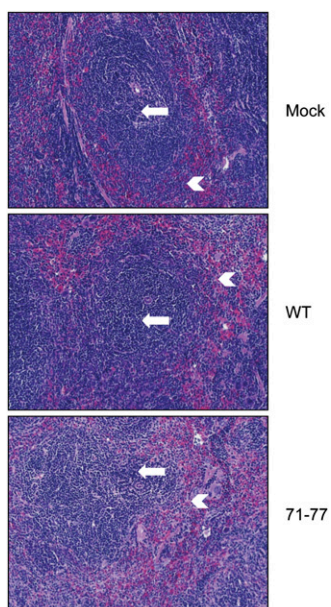

**Fig. S2.** H&E staining of spleen sections from mock, WT, or 71-77 mutant virus-infected mice at 120 h p.i. Red pulp is indicated by arrowheads, and white pulp is indicated by arrows. Results are representative of multiple sections from three mice. Original magnification: 200 $\times$ .

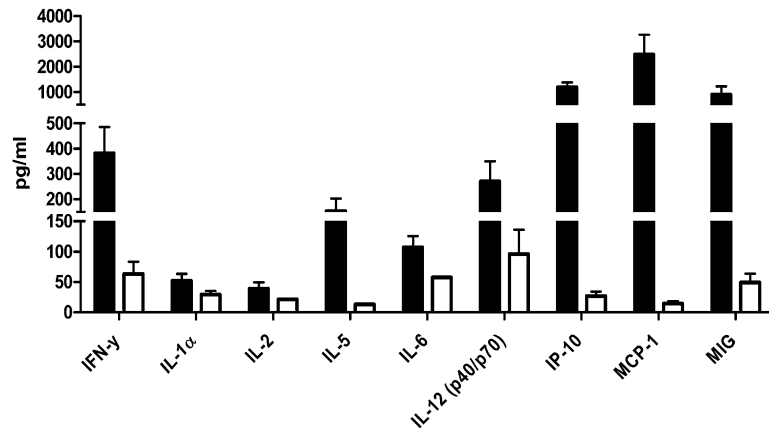

**Fig. S3.** Luminex bead array analysis of cytokine/chemokine abundance in serum comparing VEEV (filled boxes) and EEEV (open boxes) in C57BL/6 mice at 24 h p.i. Each bar represents samples from three mice, and error bars are SDs. VEEV samples had at least equal levels to EEEV for all proteins assayed, and factors that were significantly higher with VEEV ( $P < 0.05$ ) are shown.

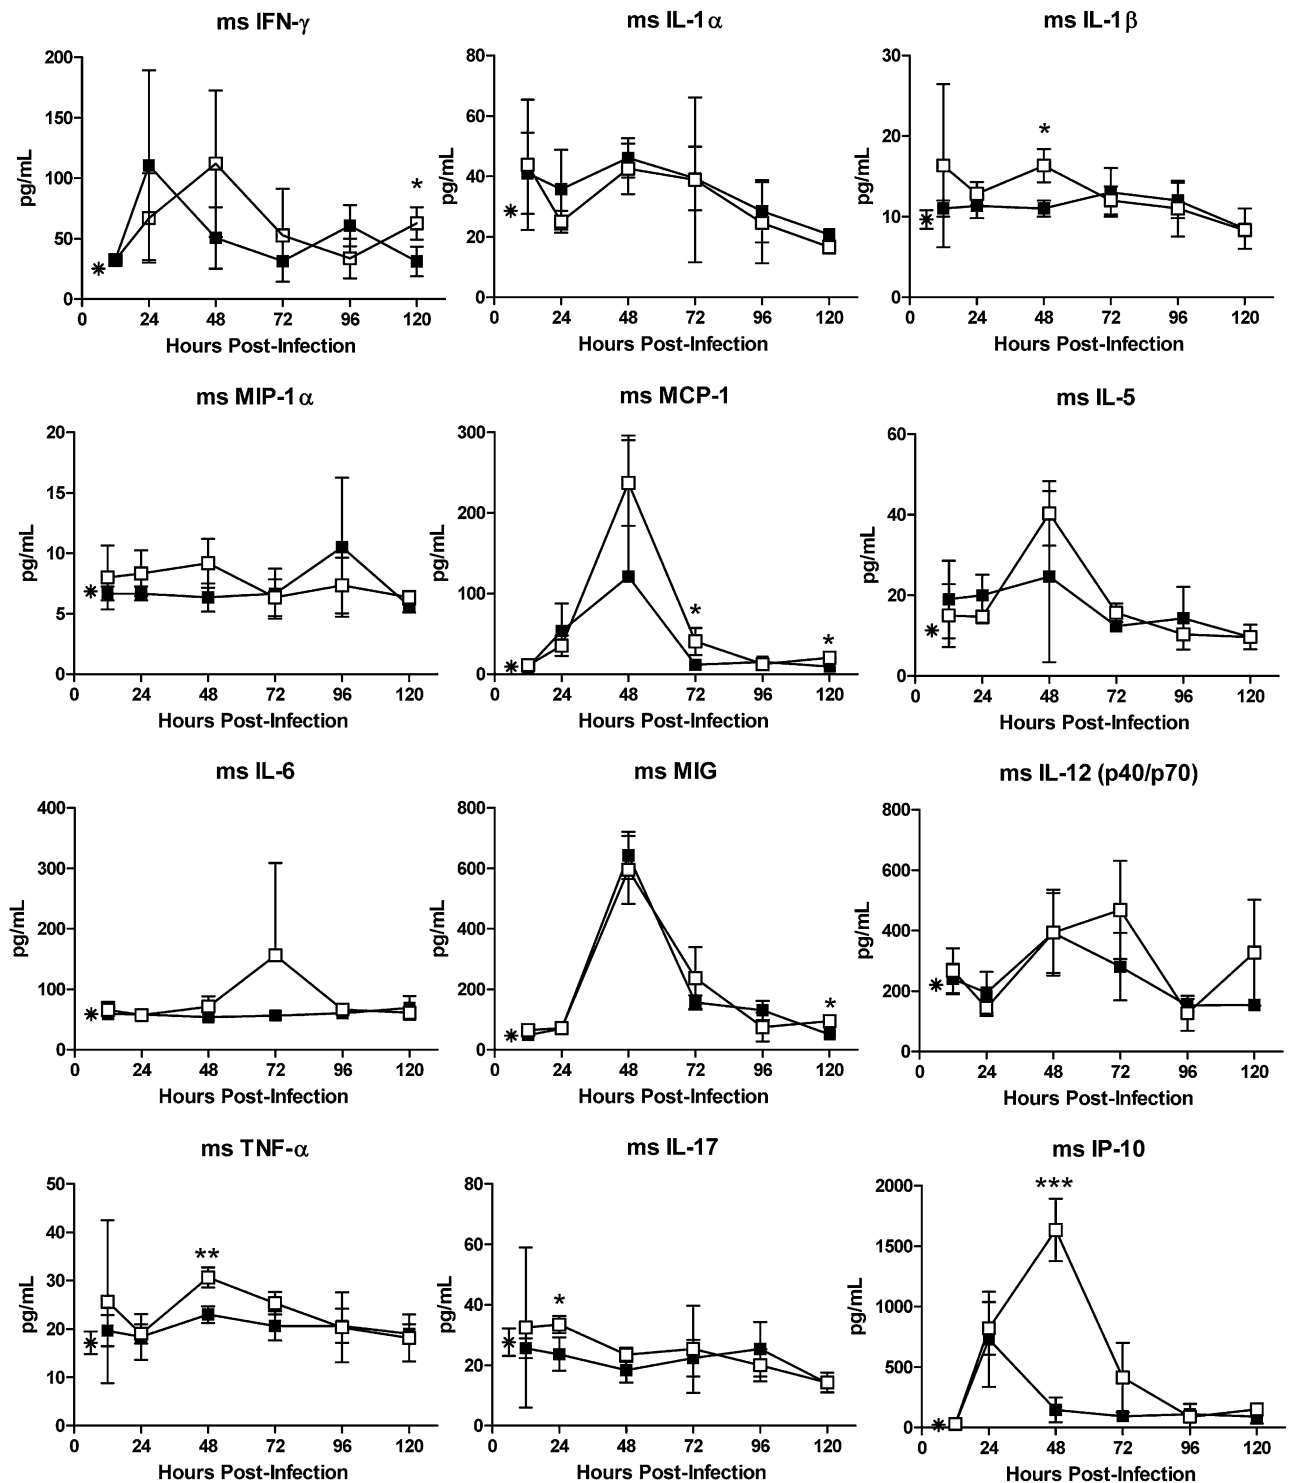

Fig. 54. Luminex bead array cytokine and chemokine analyses of serum from CD-1 mice infected with equal particles of wt EEEV (filled boxes) and the 71-77 mutant (open boxes) or mock-infected (filled star). Mock samples were taken at 8 h p.i. \* $P < 0.05$ ; \*\* $P < 0.01$ ; \*\*\* $P < 0.001$ .
